# Supplementary material
Source: MDPI journal article supplement (https://www.mdpi.com/1999-4907/13/10/1667)
Supplement: s1 [file s1]

**Table S1.** Van Panchayat information in Uttarakhand state.

| Division          | District      | Total Area (km <sup>2</sup> ) | Population | Population Increase (%) | Literacy (%) | Total Forest Area (km <sup>2</sup> ) | Village Number | VP Number | VP Forest Area (km <sup>2</sup> ) | VP Total Revenue (Rp.) | VP / Village Number ratio (%) | VP Area/ Total Forest Area (%) | VP Area/ VP no. (km <sup>2</sup> ) | VP Revenue/ Number (Rp.) |
|-------------------|---------------|-------------------------------|------------|-------------------------|--------------|--------------------------------------|----------------|-----------|-----------------------------------|------------------------|-------------------------------|--------------------------------|------------------------------------|--------------------------|
| Garhwal           | Tehri         | 3,642                         | 620,000    | 2.4                     | 76.4         | 3,216                                | 1,868          | 1,332     | 132                               | 0                      | 71.31                         | 4.1                            | 0.10                               | 0                        |
|                   | Uttarakashi   | 8,016                         | 330,000    | 11.9                    | 75.8         | 7,217                                | 710            | 644       | 73                                | 660,000                | 90.70                         | 1.0                            | 0.11                               | 1025                     |
|                   | Pauri Garhwal | 5,329                         | 790,000    | -1.4                    | 82.0         | 3,851                                | 3,483          | 2,431     | 528                               | 1,260,000              | 69.80                         | 13.7                           | 0.22                               | 518                      |
|                   | Dehradun      | 3,088                         | 1,700,000  | 32.3                    | 84.3         | 2,018                                | 771            | 215       | 77                                | 0                      | 27.89                         | 3.8                            | 0.36                               | 0                        |
|                   | Rudraprayag   | 1,984                         | 240,000    | 6.5                     | 80.0         | 1,804                                | 690            | 574       | 207                               | 520,000                | 83.19                         | 11.5                           | 0.36                               | 906                      |
|                   | Chamoli       | 8,030                         | 390,000    | 5.7                     | 82.7         | 5,061                                | 1,252          | 1,082     | 1,884                             | 5,790,000              | 86.42                         | 37.2                           | 1.74                               | 5351                     |
| Kumaon            | Haridwar      | 2,360                         | 1,890,000  | 30.6                    | 73.4         | 724                                  | 636            | 0         | 0                                 | 0                      | NR                            | NR                             | NR                                 | NR                       |
|                   | Almora        | 3,139                         | 620,000    | -1.3                    | 80.5         | 2,362                                | 2,294          | 2,194     | 699                               | 41,400,000             | 95.64                         | 29.6                           | 0.32                               | 18870                    |
|                   | Bageshwar     | 2,246                         | 260,000    | 4.2                     | 80.0         | 1,102                                | 948            | 822       | 388                               | 12,690,000             | 86.71                         | 35.2                           | 0.47                               | 15438                    |
|                   | Champawat     | 1,766                         | 260,000    | 15.6                    | 79.8         | 1,323                                | 721            | 629       | 312                               | 440,000                | 87.24                         | 23.6                           | 0.50                               | 700                      |
|                   | Pithoragarh   | 7,090                         | 480,000    | 4.6                     | 82.3         | 2,053                                | 1,678          | 1,666     | 871                               | 1,650,000              | 99.28                         | 42.4                           | 0.52                               | 990                      |
|                   | Nainital      | 4,251                         | 950,000    | 25.1                    | 83.9         | 2,982                                | 1,160          | 495       | 281                               | 8,800,000              | 42.67                         | 9.4                            | 0.57                               | 17778                    |
| Udham Singh Nagar |               | 2,542                         | 1,650,000  | 33.5                    | 73.1         | 938                                  | 708            | 0         | 0                                 | 0                      | NR                            | NR                             | NR                                 | NR                       |
| Total             |               | 53,483                        | 10,180,000 | 13.1                    | 79.5         | 34,651                               | 16,919         | 12,089    | 5,449                             | 73,210,000             | 71.45                         | 15.7                           | 0.45                               | 6056                     |

Data compiled from VP Atlas 2007, Uttarakhand Forest Statistics 2014 and Census 2001; 2011.  
Population increase percentage is compared by previous census at 2001.

**Table S2.** Data of selection: Interview with the *Sarpanch* (Van panchayat leader) at Uttarakhand (Field Survey 2011-2015; VP Atlas 2007)

| District                                   | Almora                                                 |                                                                                |                                  |                                                                                |                                                |                                              |                                          |                  |                                                |                                                | Chamoli                                        |                                               |                                      |                     |                                                  |                                      |                                                 |                                                                                    |                                                                                                        |                                              | Tehri Garhwal                           |                                                 |                                         |                             |                             |  |  |  |  |  |
|--------------------------------------------|--------------------------------------------------------|--------------------------------------------------------------------------------|----------------------------------|--------------------------------------------------------------------------------|------------------------------------------------|----------------------------------------------|------------------------------------------|------------------|------------------------------------------------|------------------------------------------------|------------------------------------------------|-----------------------------------------------|--------------------------------------|---------------------|--------------------------------------------------|--------------------------------------|-------------------------------------------------|------------------------------------------------------------------------------------|--------------------------------------------------------------------------------------------------------|----------------------------------------------|-----------------------------------------|-------------------------------------------------|-----------------------------------------|-----------------------------|-----------------------------|--|--|--|--|--|
| VP                                         | Q                                                      | U                                                                              | K                                | G                                                                              | A                                              | S                                            | D                                        | V                | DH                                             | T                                              | K                                              | M                                             | T                                    | N                   | SR                                               | S                                    | TM*1                                            | GDKP                                                                               | *2                                                                                                     | G                                            | D                                       | M                                               | B                                       | S                           | K                           |  |  |  |  |  |
| Household number                           | 22                                                     | 60                                                                             | 48                               | 22                                                                             | 71                                             | 65                                           | 30                                       | 208              | NA                                             | 750                                            | 750                                            | Population: 223 (OC:33, SC:9)                 | 35                                   | 72                  | 42                                               | 85                                   | 22                                              | 153                                                                                | 165; 128; 140; 128                                                                                     | 200 (OC:184, SC:16)                          | 51 (OC: 19; SC: 32)                     | 40                                              | 85 (OC: Brahmin 60%, Rajput 40%, SC: 1) | 42 (OC: 37; SC: 5)          | 140                         |  |  |  |  |  |
| Population: 130                            | 450                                                    | population (No SC)                                                             | 118 population SC: 4             | population: 426                                                                | 111 Population: (No SC)                        | 208                                          | NA                                       | 750              | 750                                            | Population: 223 (OC:33, SC:9)                  | 35                                             | 72                                            | 42                                   | 85                  | 22                                               | 153                                  | 165; 128; 140; 128                              | 200 (OC:184, SC:16)                                                                | 51 (OC: 19; SC: 32)                                                                                    | 40                                           | 85 (OC: Brahmin 60%, Rajput 40%, SC: 1) | 42 (OC: 37; SC: 5)                              | 140                                     |                             |                             |  |  |  |  |  |
| Altitude(m)                                | 1050                                                   | 1000                                                                           | 1300                             | 1900-2100                                                                      | 1700-2100                                      | 1800                                         | 1250                                     | 1978             | 1820-1940                                      | 1700-1850                                      | 1450-1650                                      | 1400-2030                                     | 1350                                 | 1300                | 1250                                             | 1300                                 | 1400                                            | 1600                                                                               | 1200                                                                                                   | 1300                                         | 1800                                    | 2003                                            | NA                                      | NA                          | 2005                        |  |  |  |  |  |
| VP established year                        | ~15 years ago                                          | 2001                                                                           | 2004                             | 1907                                                                           | 1936                                           | 1933                                         | 1948                                     | 1978             | 1999                                           | 1995                                           | 1972                                           | 1963                                          | 1946                                 | 1946                | 1962                                             | 2001                                 | 1963                                            | 1949                                                                               | 1948                                                                                                   | 1993                                         | 2005                                    | 2005                                            | 2005                                    | 2005                        | 2005                        |  |  |  |  |  |
| Type of forest                             | Chir Pine ( <i>Pinus roxburghii</i> ) dominated forest | Chir Pine and broad-leaved forest trees                                        | Dominated by broad-leaved forest | Dominated by Oak, others are pines dominated with brass, bunal                 | Ranji Oak ( <i>Lacostichophora</i> ) dominated | Chir pine dominated and Oak dominated forest | Chir pine, Matrica, Coddar, mixed forest | Chir Pine forest | Dominated Pine ( <i>P. roxburghii</i> ) forest | Dominated Pine ( <i>P. roxburghii</i> ) forest | Mixed forest dominated, Oak dominates forest   | Ranji dominated, Mixed forest, planted forest | Ranji oak dominated                  | Ranji oak dominated | Ranji, Blans, Ranji, Blans, Chir... mixed forest | Ranji oak dominated                  | Ranji dominated, Chir Pine forest, mixed forest | Ranji dominated, forest with some patches of Chir pine ( <i>Pinus roxburghii</i> ) | Oak ( <i>Quercus</i> spp.) dominated forest with some patches of Chir pine ( <i>Pinus roxburghii</i> ) | Some broad-leaved forest trees and Chir Pine | Oak                                     | ND                                              | ND                                      | ND                          |                             |  |  |  |  |  |
| Codition of forest                         | Slightly fair (some was damages by forest fire)        | Fair                                                                           | Fair                             | Super Fair                                                                     | Fair                                           | Fair                                         | Fair                                     | Fair             | Fair                                           | Fair                                           | Pretty Fair                                    | Pretty Fair                                   | Fair                                 | Not fair            | Fair                                             | Fair                                 | Fair                                            | Fair                                                                               | Fair                                                                                                   | Fair                                         | Slightly fair (less trees)              | Fair                                            | Slightly fair (less trees)              | ND                          | ND                          |  |  |  |  |  |
| Woman's self-supporting organization group | No                                                     | Jalkali Maa SHG                                                                | NA                               | Jai Durga SHG                                                                  | Bindrarashani SHG                              | Yes(SHG)                                     | Yes(SHG)                                 | Yes(SHG)         | Atri SHG, Pushp SHG, Vinay SHG                 | Krishna SHG                                    | Woman welfare G (100p/HH) self help G (50p/HH) | Yes                                           | Yes                                  | Yes                 | Yes                                              | Yes                                  | Yes                                             | Yes                                                                                | Yes                                                                                                    | Yes                                          | Yes (Nagariya Samiti and "Saita Samu")  | No                                              | No                                      | No                          | No                          |  |  |  |  |  |
| Support from NGO / Government              | No                                                     | Irrigation for agriculture/CHEA since 2008 for plantation and soil improvement | No                               | Irrigation for agriculture/CHEA since 2008 for plantation and soil improvement | CHEA                                           | No                                           | No                                       | No               | CHEA                                           | CHEA                                           | CAMPA                                          | JFM CAMPA                                     | No                                   | No                  | No                                               | No                                   | No                                              | NA                                                                                 | CAMPA                                                                                                  | Bamboo project from Uttarakhand FD           | Campa (government)                      | Government agriculture scheme to Gram Panchayat | No project                              | Microplan from Agbica (NGO) | Microplan from Agbica (NGO) |  |  |  |  |  |
| Area of VP (ha)                            | 39.832                                                 | 32                                                                             | 23.8                             | 87                                                                             | 145                                            | 110.8                                        | 2.4                                      | 24.4             | 58ha                                           | 109ha                                          | 56ha                                           | 45                                            | 65.5                                 | 41.06               | RF-250ha (VP-118ha) VP-40                        | 20ha(+C/S forest)                    | 48                                              | 876                                                                                | 185.6                                                                                                  | 21 ha                                        | 29 ha                                   | 8 ha                                            | 11.8 ha                                 | 18.5 ha                     |                             |  |  |  |  |  |
| Distance to VP (km)                        | 0.5km                                                  | 0.5km                                                                          | 0.5km                            | 0.1km                                                                          | 0.5km                                          | 1.5km                                        | NA                                       | NA               | NA                                             | NA                                             | 0.5km                                          | 0.3km                                         | 0.5km                                | 1km                 | NA                                               | NA                                   | 1km                                             | 1km                                                                                | NA                                                                                                     | NA                                           | 0.5 km                                  | 2-3 km                                          | 0.5 km                                  | 4-5 km                      |                             |  |  |  |  |  |
| Area of plantation (ha)                    | NA                                                     | NA                                                                             | NA                               | NA                                                                             | 0.5km                                          | 1.5km                                        | NA                                       | NA               | NA                                             | NA                                             | 15ha                                           | 15ha                                          | 15ha                                 | 15ha                | 200p/ha                                          | NA                                   | NA                                              | NA                                                                                 | NA                                                                                                     | NA                                           | 15 ha (Bamboo, 10 ha Oak, 5 ha)         | 8 ha                                            | 10 ha                                   | 10 ha                       |                             |  |  |  |  |  |
| Sarpanch (VP leader)                       | Male                                                   | Male                                                                           | Male                             | Female                                                                         | Male                                           | Male                                         | Male                                     | Male             | Male                                           | Male                                           | Male                                           | Male                                          | Male                                 | Male                | Male                                             | Male                                 | Male                                            | Male                                                                               | Male                                                                                                   | Male                                         | Male                                    | No                                              | No                                      | No                          | No                          |  |  |  |  |  |
| Chowkidar (Forest Guard)                   | No                                                     | Yes                                                                            | Yes                              | Yes                                                                            | Yes                                            | Yes                                          | NA                                       | NA               | Yes                                            | Yes                                            | Yes                                            | Yes                                           | Yes                                  | Yes                 | Yes                                              | Yes                                  | Yes                                             | Yes                                                                                | Yes                                                                                                    | Yes                                          | Male                                    | Male                                            | Female                                  | Female                      | Male                        |  |  |  |  |  |
| Managed before the VP                      | NA                                                     | No Rules                                                                       | NA                               | Civil/Squand land, there were no rules                                         | Civil/Squand land, there were no rules         | NA                                           | NA                                       | NA               | NA                                             | NA                                             | Civil/Squand land, there were no rules         | NA                                            | NA                                   | Reserved Forest     | C/S forest                                       | NA                                   | NA                                              | NA                                                                                 | NA                                                                                                     | NA                                           | Civil/Squand land/Forest Department     | ND                                              | ND                                      | JFM 1999-2003               |                             |  |  |  |  |  |
| MC (gender)                                | Male:5 (no female)                                     | Male:3; Female:4                                                               | Male:3; Female:4                 | Male:3; Female:4                                                               | Male:3; Female:4                               | Male:3; Female:4                             | NA                                       | NA               | Male:3; Female:4                               | Male:3; Female:4                               | Male:3; Female:4                               | Male:3; Female:4                              | Male:3; Female:4                     | Male:3; Female:4    | Male:3; Female:4                                 | Male:3; Female:4                     | Male:3; Female:4                                | Male:3; Female:4                                                                   | Male:3; Female:4                                                                                       | Male:3; Female:4                             | Male:3; Female:4                        | Male:3; Female:4                                | Male:3; Female:4                        | Male:3; Female:4            | Male:3; Female:4            |  |  |  |  |  |
| MC (caste)                                 | GC:5 (no caste)                                        | GC:2, SC:2 (male:1; female:1)                                                  | NA                               | GC:6; SC:3                                                                     | OC:8; SC:1                                     | NA                                           | NA                                       | NA               | GC:6; SC:3                                     | GC:7; SC:2                                     | GC:9                                           | GC:9                                          | GC:3                                 | GC:3                | GC:3                                             | GC:3                                 | GC:3                                            | GC:3                                                                               | GC:3                                                                                                   | GC:3                                         | GC:3                                    | GC:3                                            | GC:3                                    | GC:3                        | GC:3                        |  |  |  |  |  |
| Land holding                               | NA                                                     | land less 0, 10-50hect 0, 50-200hect 40                                        | NA                               | NA                                                                             | NA                                             | NA                                           | NA                                       | NA               | NA                                             | NA                                             | NA                                             | NA                                            | NA                                   | NA                  | NA                                               | NA                                   | NA                                              | NA                                                                                 | NA                                                                                                     | 230ha with reserved forest                   | Landless: 0                             | Landless: 0                                     | Landless: 0                             | Landless: 0                 |                             |  |  |  |  |  |
| VP account (Rp.)                           | 0                                                      | 156613                                                                         | 0                                | 0                                                                              | 34035                                          | 28664                                        | 0                                        | 200              | 0                                              | 426479                                         | 6880                                           | 0                                             | 2707                                 | 2261                | 2871                                             | 0                                    | 0                                               | 35994                                                                              | 10990                                                                                                  | NA                                           | NA                                      | NA                                              | NA                                      | NA                          | NA                          |  |  |  |  |  |
| Microplan                                  | No                                                     | Yes                                                                            | No                               | No                                                                             | Yes                                            | No                                           | No                                       | No               | Yes                                            | Yes                                            | Yes                                            | No                                            | Yes at Forest department in Ranikhet | NA                  | NA                                               | Yes at Forest department in Ranikhet | NA                                              | No                                                                                 | NA                                                                                                     | Working report                               | Yes                                     | No                                              | No                                      | Yes                         | Yes                         |  |  |  |  |  |
| Reason for VP                              | NA                                                     | NA                                                                             | NA                               | NA                                                                             | NA                                             | NA                                           | NA                                       | NA               | NA                                             | NA                                             | Demand from community                          | Demand from community                         | Demand from community                | NA                  | Gram Sabha                                       | Demand from community                | NA                                              | NA                                                                                 | NA                                                                                                     | Demand from community                        | ND                                      | Request from Gram panchayat                     | Proposal from Uttarakhand FD            | Demand from community       |                             |  |  |  |  |  |

\*1) There is another joint VP forest at Falkande Tali, referred to Rithiya VP;

\*2) It is also a joint VP consisting of 4 villages: This field survey was examined in 2011-2015; Abbreviations: OC, other caste; SC, scheduled caste; NGO, non-government organization; JFM, joint forest management; FD, forest department; ND, not determined.

**Table S3.** Variation in data set of house hold (HH) numbers by interview at each VP. Source: prepared by the author based on the results of a structured interview of households.

| Type | Village                                 |                                 | D (N=42) | G (N=14) | K (N=31) | M (N=26) | Total (N=113) |
|------|-----------------------------------------|---------------------------------|----------|----------|----------|----------|---------------|
| I    | 1. Family profile                       | Total HH number                 | 52       | 22       | 31       | 26       | 131           |
|      |                                         | Interviewed HH number           | 42       | 14       | 31       | 26       | 113           |
|      |                                         | Average number of family member | 6.8      | 7        | 6        | 6.4      |               |
|      |                                         | Work outside                    | 40       | 7        | 17       | NA       | 64            |
|      |                                         | Study outside                   | 40       | 1        | NA       | NA       | 41            |
| Type | Village                                 |                                 | D (N=42) | G (N=14) | K (N=31) | M (N=26) | Total (N=113) |
| II   | 6. Forest condition after VP was formed | Highly improved                 | 38       | 2        | 28       | 22       | 90            |
|      |                                         | Improved                        | 4        | 3        | 3        | 3        | 13            |
|      |                                         | Remain                          | 0        | 8        | 0        | 0        | 8             |
|      |                                         | Degraded                        | 0        | 1        | 0        | 0        | 1             |
|      |                                         | Badly degraded                  | 0        | 0        | 0        | 0        | 0             |

|          |                              |                               |             |      |                    |                               |      |
|----------|------------------------------|-------------------------------|-------------|------|--------------------|-------------------------------|------|
| II       | 2. (MC)                      | No                            | 34          | 8    | 23                 | 19                            | 84   |
|          |                              | Yes                           | 8           | 6    | 8                  | 7                             | 29   |
|          | 3. Caste                     | SC                            | 22          | 3    | 0                  | 2                             | 27   |
|          |                              | OC                            | 11          | 2    | 25:Rawat<br>6:Negi | 1:Bisht<br>5:Rawat<br>18:Negi | 68   |
|          |                              | Brahmin                       | 9           | 9    | 0                  | 0                             | 18   |
|          | 4. Properties)*              | TV                            | 28          | 8    | 13                 | 14                            | 63   |
|          |                              | Car                           | 3           | 1    | 0                  | 0                             | 4    |
|          |                              | Mobile telephone              | 39          | 31   | 30                 | 23                            | 123  |
|          |                              | Refrigerator                  | 3           | 2    | 3                  | 1                             | 9    |
|          |                              | Dish TV                       | 14          | 4    | 14                 | 10                            | 42   |
|          |                              | Sawing machine                | 3           | NA   | 14                 | 1                             | 18   |
|          |                              | Washing machine               | 0           | 0    | 1                  | 0                             | 1    |
|          |                              | Computer                      | 1           | 0    | 2                  | 1                             | 4    |
|          |                              | 5. Infrastruc-<br>ture)*      | Clean water | 42   | 14                 | 31                            | 26   |
|          | Electricity                  |                               | 41          | 13   | 30                 | 24                            | 108  |
|          | Firewood                     |                               | 42          | 13   | 30                 | 25                            | 110  |
|          | Solar light                  |                               | 1           | 0    | 11                 | 0                             | 12   |
|          | Kerosene                     |                               | 3           | 13   | 26                 | 25                            | 67   |
|          | LPG                          |                               | 24          | 4    | 22                 | 3                             | 53   |
|          | 6. Main<br>livelihood)*      | Agriculture                   | 27          | 5    | 6                  | 22                            | 60   |
|          |                              | Livestock                     | 2           | 0    | 1                  | 1                             | 4    |
|          |                              | Forest activities             | 5           | 0    | 1                  | 0                             | 6    |
|          |                              | Private work                  | 5           | 9    | 0                  | 1                             | 15   |
|          |                              | Government<br>work            | 3           | 0    | 24                 | 3                             | 30   |
|          | 7. House<br>construction)*   | Wood, mud &<br>straw          | 2           | 0    | 5                  | 2                             | 9    |
|          |                              | Wood & cement<br>(wood mixed) | 35          | 14   | 26                 | 24                            | 99   |
|          |                              | Cement & Bricks<br>(modern)   | 5           | 0    | 0                  | 0                             | 5    |
|          | 8. Livestock's)*             | Cow                           | 34          | 14   | 13                 | 23                            | 84   |
|          |                              | Bull                          | 7           | 1    | 2                  | 2                             | 12   |
|          |                              | Calf                          | 6           | 5    | 2                  | 1                             | 14   |
|          |                              | Goat                          | 15          | 11   | 3                  | 4                             | 33   |
|          |                              | Buffalo                       | 22          | 2    | 19                 | 8                             | 51   |
|          |                              | Ox                            | 11          | 10   | 7                  | 22                            | 50   |
|          |                              | Hen                           | 0           | 1    | 0                  | 4                             | 5    |
|          | 1. Distance to VPF (km)      |                               | 0.37        | 0.49 | 0.43               | 0.72                          | 0.50 |
|          | 2. Collection of<br>firewood | Yes                           | 41          | 14   | 30                 | 25                            | 110  |
|          |                              | No                            | 1           | 0    | 1                  | 1                             | 3    |
|          | Hour (/week)                 |                               | 7.60        | 2.24 | 3.00               | 6.70                          | 4.88 |
|          | 3. Grazing<br>animals        | Yes                           | 30          | 11   | 3                  | 1                             | 45   |
|          |                              | No                            | 12          | 3    | 28                 | 25                            | 68   |
|          | 4. Firewood<br>impact        | Increased                     | 38          | 10   | 28                 | 25                            | 101  |
|          |                              | Same                          | 4           | 4    | 3                  | 1                             | 12   |
|          |                              | Declined                      | 0           | 0    | 0                  | 0                             | 0    |
|          | 5. Fodder<br>impact          | Increased                     | 39          | 11   | 27                 | 25                            | 102  |
| Same     |                              | 3                             | 1           | 4    | 1                  | 9                             |      |
| Declined |                              | 0                             | 2           | 0    | 0                  | 2                             |      |

|                                               |                                                       |                                 |     |     |      |      |     |
|-----------------------------------------------|-------------------------------------------------------|---------------------------------|-----|-----|------|------|-----|
| III                                           |                                                       | NA                              | 0   | 0   | 0    | 1    | 1   |
|                                               | 7. Benefit of<br>the VP)*                             | Forest<br>recovery              | 32  | 11  | NA   | NA   |     |
|                                               |                                                       | Forest<br>products              | 5   | 6   | NA   | NA   |     |
|                                               |                                                       | Village<br>development          | 30  | 11  | NA   | NA   |     |
|                                               |                                                       | Employment                      | 16  | 2   | NA   | NA   |     |
|                                               |                                                       | No idea                         | 2   | 0   | NA   | NA   |     |
|                                               | 8. VP effect<br>on the forest<br>condition            | Large<br>positive               | 39  | 4   | 23   | 21   | 87  |
|                                               |                                                       | Small<br>positive               | 2   | 3   | 6    | 5    | 16  |
|                                               |                                                       | No effect                       | 1   | 5   | 2    | 0    | 8   |
|                                               |                                                       | Small<br>negative               | 0   | 2   | 0    | 0    | 2   |
|                                               |                                                       | Large<br>negative               | 0   | 0   | 0    | 0    | 0   |
|                                               |                                                       | NA                              | 0   | 0   | 0    | 0    | 0   |
|                                               |                                                       |                                 |     |     |      |      |     |
|                                               | 9. Expecta-<br>tion before<br>the VP was<br>formed )* | Forest<br>recovery              | 35  | 14  | NA   | NA   |     |
|                                               |                                                       | Benefit of<br>forest<br>product | 12  | 1   | NA   | NA   |     |
|                                               |                                                       | Village<br>development          | 33  | 1   | NA   | NA   |     |
|                                               |                                                       | Employment<br>opportunity       | 33  | 1   | NA   | NA   |     |
|                                               |                                                       | NA                              | 2   | 0   | NA   | NA   |     |
|                                               | 10. Impact<br>after the<br>VP)*                       | Increased<br>forest<br>product  | 29  | 7   | NA   | 21   |     |
|                                               |                                                       | Regenerate<br>forest            | 33  | 7   | NA   | 21   |     |
|                                               |                                                       | Employment<br>opportunity       | 29  | 0   | NA   | 19   |     |
|                                               |                                                       | Social aspect<br>change         | 27  | 6   | NA   | 16   |     |
|                                               |                                                       | Forced by<br>FD                 | 2   | 1   | NA   | 0    |     |
|                                               |                                                       | Others                          | 3   | 1   | NA   | 1    |     |
|                                               | 1.Name of<br>VP leader                                | Known                           | 38  | 10  | 31   | 25   | 104 |
|                                               |                                                       | Not known                       | 4   | 4   | 0    | 0    | 8   |
|                                               |                                                       | NA                              | 0   | 0   | 0    | 1    | 1   |
|                                               | 2. Participa-<br>tion of VP<br>meeting                | Yes                             | 32  | 10  | 31   | 25   | 98  |
|                                               |                                                       | No                              | 10  | 4   | 0    | 0    | 14  |
|                                               |                                                       | NA                              | 0   | 0   | 0    | 1    | 1   |
|                                               | 3. Participa-<br>tion                                 | Actual                          | 4   | 4   | 12   | 12   |     |
|                                               |                                                       | Average                         | 1.3 | 2.3 | 10.1 | 12.0 |     |
|                                               | 4. Attitude at<br>meeting                             | Be present                      | 15  | 4   | 2    | 1    | 22  |
|                                               |                                                       | Ask opinion                     | 2   | 0   | 4    | 4    | 10  |
| Express<br>opinions,<br>taking<br>initiatives |                                                       | 7                               | 3   | 7   | 13   | 30   |     |
| Have voice,<br>influenced<br>decisions        |                                                       | 4                               | 4   | 8   | 6    | 22   |     |
| Ask to<br>undertake<br>specific tasks         |                                                       | 1                               | 3   | 10  | 1    | 15   |     |
| NA                                            |                                                       | 13                              | 0   | 0   | 1    | 14   |     |
| 5.Microplan                                   | Not know                                              | 28                              | 3   | 26  | 19   | 76   |     |
|                                               | Know                                                  | 14                              | 11  | 5   | 6    | 36   |     |
|                                               | NA                                                    | 0                               | 0   | 0   | 1    | 1    |     |
| 6. Participate<br>in the<br>microplan         | No                                                    | 30                              | 3   | 31  | 21   | 85   |     |
|                                               | Yes                                                   | 12                              | 11  | 3   | 4    | 30   |     |
|                                               | NA                                                    | 0                               | 0   | 0   | 1    | 1    |     |
| 7. Mer-<br>it/Benefit of<br>MC activity       | No                                                    | 39                              | 8   | 29  | 20   | 96   |     |
|                                               | Yes                                                   | 3                               | 6   | 2   | 5    | 16   |     |
|                                               | NA                                                    | 0                               | 0   | 0   | 1    | 1    |     |

\*: Multiple answers allowed

Note:

I: Household's livelihood situation; II: Use and perception of the forest; and, III: Participation to management.

MC: Management committee; HH: Household; SC: Scheduled caste; TV: Television; PC: Personal computer; LPG: Liquefied petroleum gas; FD: Forest department; NA: Not available. \*) Multiple answers allowed.
